# Supplementary material for: Bio-inspired carbon nitride mesoporous spheres for artificial photosynthesis: photocatalytic cofactor regeneration for sustainable enzymatic synthesis
Source: Royal Society of Chemistry journal article supplement (doi:10.1039/c4ta00793j), 2014-01-01
Supplement: c4ta00793j1.pdf [file c4ta00793j1.pdf]

## Supporting Information

Bio-inspired carbon nitride mesoporous spheres for artificial photosynthesis:  
photocatalytic cofactor regeneration for sustainable enzymatic synthesis\*\*

Jianhui Huang, Markus Antonietti, and Jian Liu\*

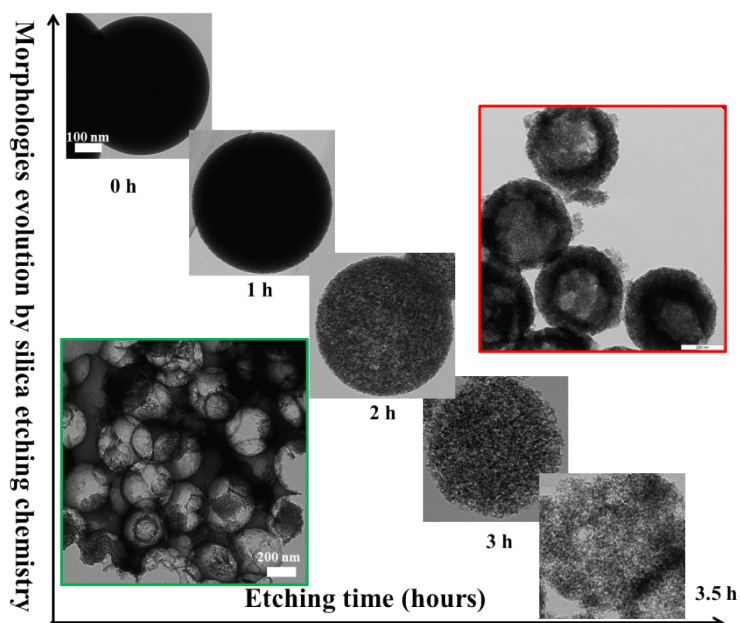

**Figure S1.** Morphologies evolution of  $\text{SiO}_2$  spheres during different etching times. The inset image with green frame indicates the unsuccessful templating from 2 hours etched samples, while the image labeled with red square indicates the successful templating from 3 hours etched samples.

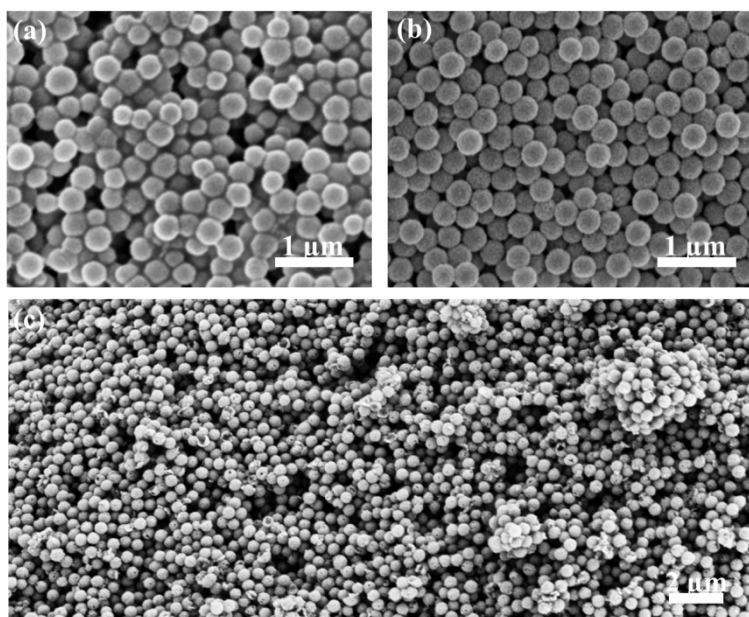

**Figure S2.** SEM images of silica before (a) and after etching (b). Image (c) illustrates the large area overview of CNMS.

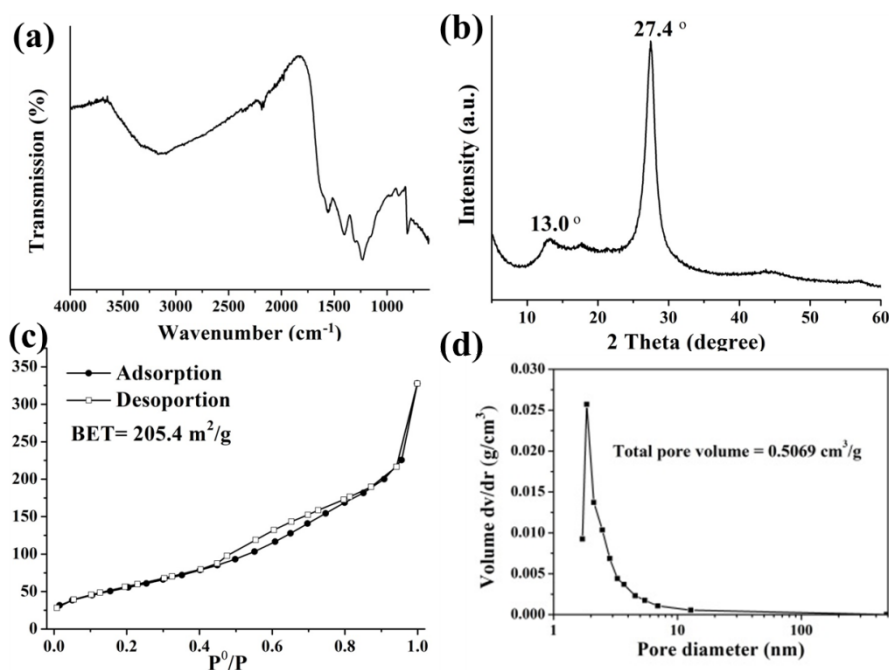

**Figure S3.** (a) FTIR spectrum of CNMS showing typical C-N heterocycle stretches in the 1100~1600  $\text{cm}^{-1}$  spectral range and the breathing mode of the tri-s-triazine units at 810  $\text{cm}^{-1}$ . (b) XRD spectrum of CNMS with two peaks at 13.0° and 27.4° ascribed to the in-planar repeat period and stacking of the conjugated aromatic system, respectively. (c)  $\text{N}_2$  sorption isotherm of CNMS with the pore size distribution plot in (d).

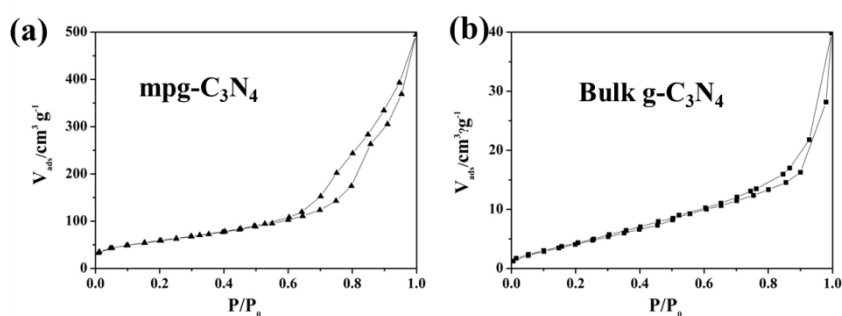

**Figure S4.**  $\text{N}_2$  sorption isotherms of mpg- $\text{C}_3\text{N}_4$  (a) and bulk g- $\text{C}_3\text{N}_4$ .

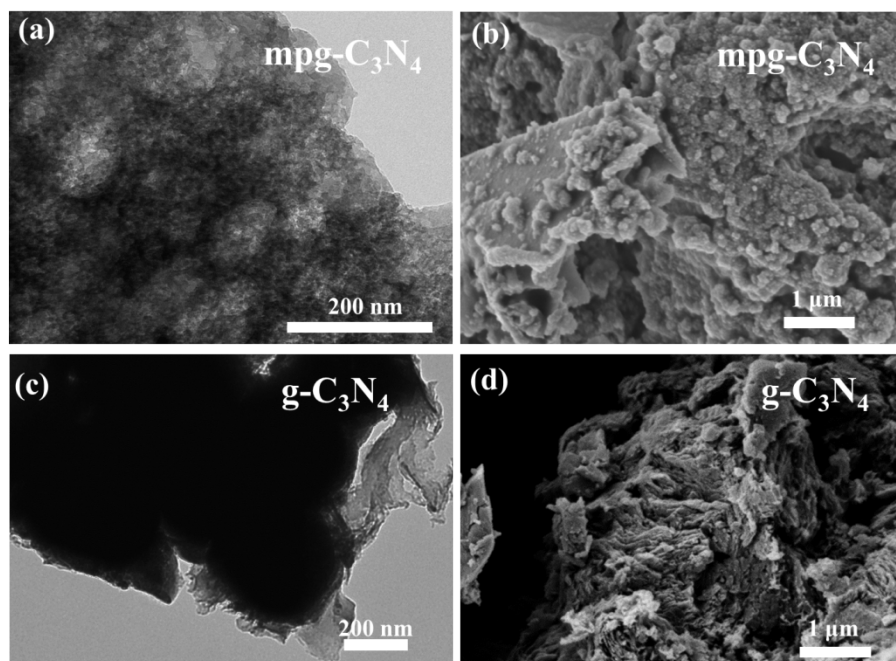

**Figure S5.** TEM and SEM characterizations of mpg-C<sub>3</sub>N<sub>4</sub> (a and b) and g-C<sub>3</sub>N<sub>4</sub> (c and d), respectively.

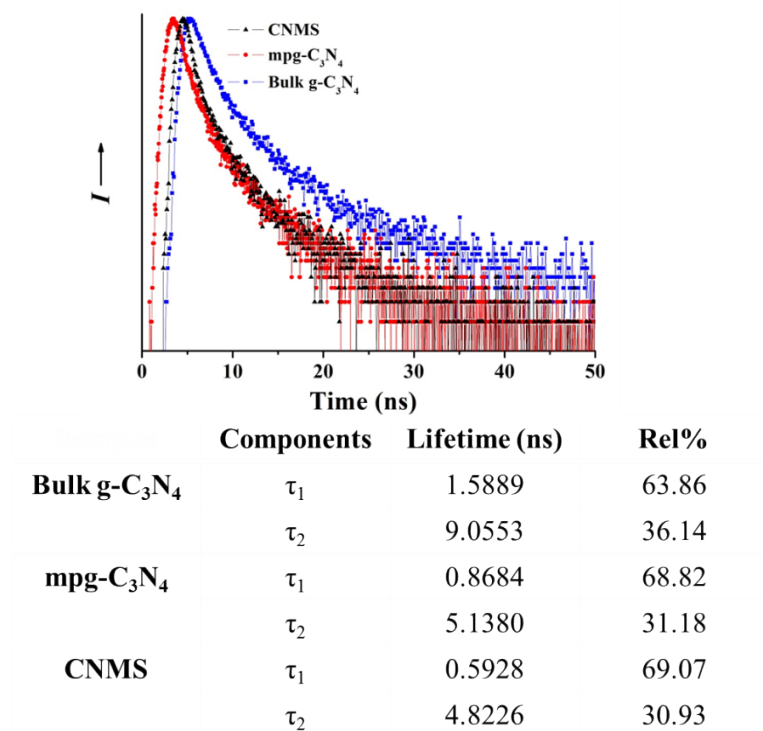

**Figure S6.** Time resolved fluorescence decay spectra of CNMS, mpg-C<sub>3</sub>N<sub>4</sub> and g-C<sub>3</sub>N<sub>4</sub>. The samples were excited by the incident light of 420 nm from a picosecond pulsed light-emitting diode.

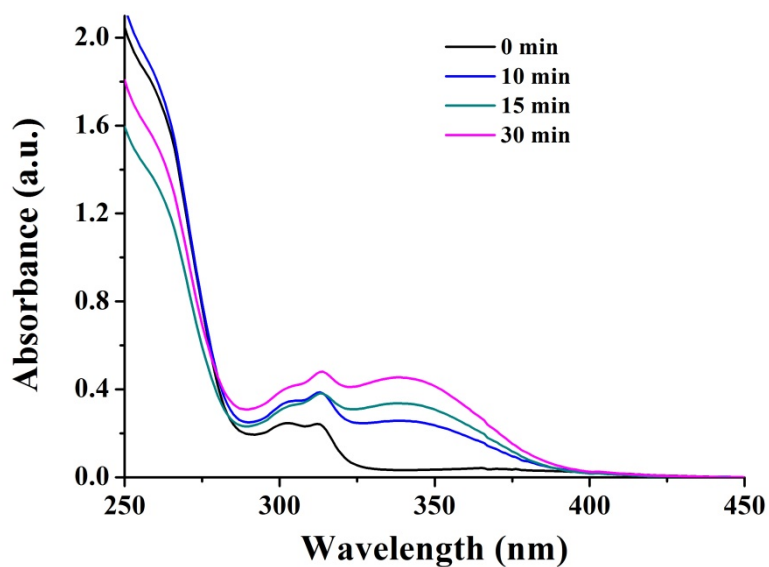

**Figure S7.** Spectral measurements of NADH concentration in mediator involved reaction solution by CNMS photocatalysis.  $\beta$ -NAD<sup>+</sup>, 1 mM; **M**, 0.25 mM; TEOA, 15 w/v%; PBS buffer, 0.1 M, pH=8; CNMS, 3 mg.

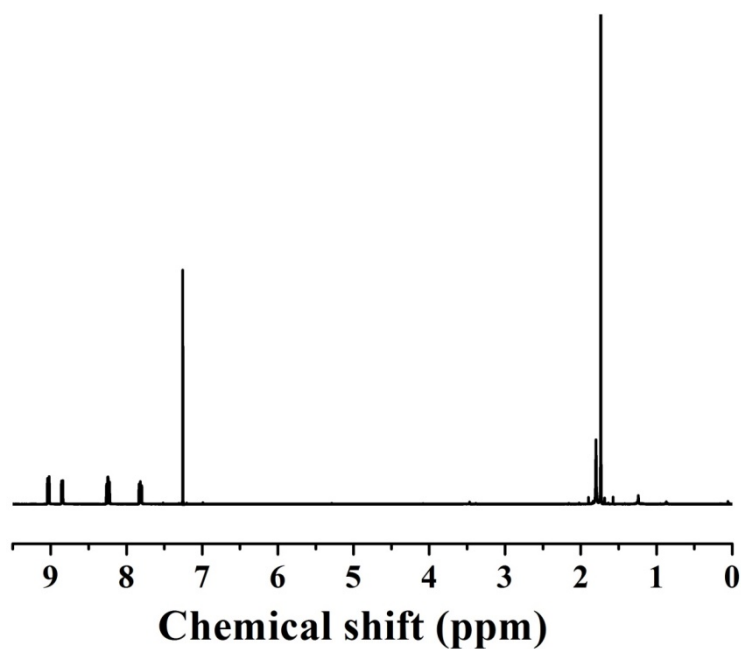

**Figure S8.** NMR of [Cp\*Rh(bpy)Cl]Cl compound. <sup>1</sup>H NMR (300 MHz, CDCl<sub>3</sub>): Cp\*[Rh(2,2'-bpy)]  $\delta$ (ppm) = 9.02 (d, 2H, H-3, 3'), 8.84 (d, 2H, H-6, 6'), 8.24 (t, 2H, H-5, 5'), 7.81 (t, 2H, H-4, 4'), 1.74 (s, 15H, Cp\*).

(a) Before the reaction: pure NADH

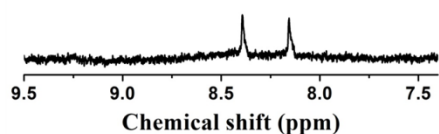

(b) After the reaction:  
Complete conversion to NAD<sup>+</sup>

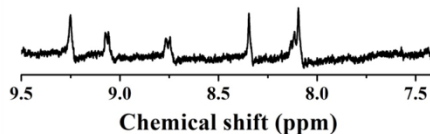

**Figure S9.** Partial HNMR spectra for the reaction between NADH and pyruvate in the presence of L-lactate dehydrogenase: (a) before the reaction; (b) after enzymatic reaction.

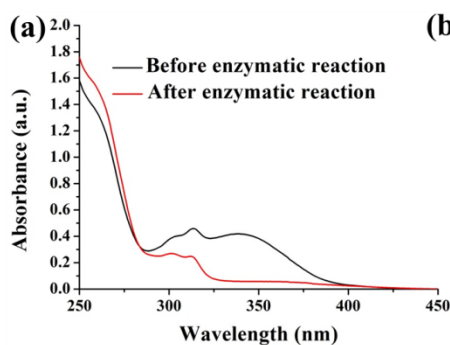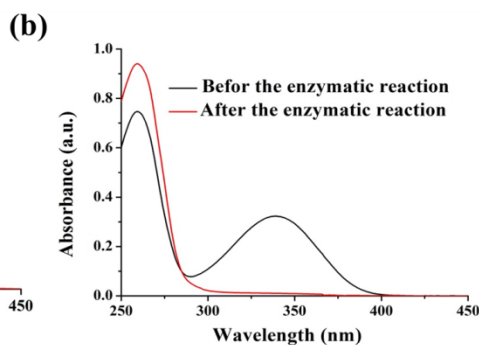

**Figure S10.** Spectral measurements of as-regenerated NADH (a) and commercial NADH (b) before (black plot) and after the enzymatic reaction (red plot), respectively.

(a) Before the reaction: pure Pyruvate

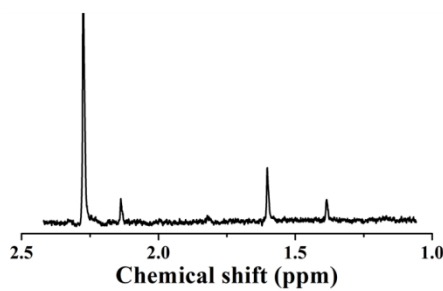

(b) After the reaction:  
Complete conversion of pyruvate to lactate

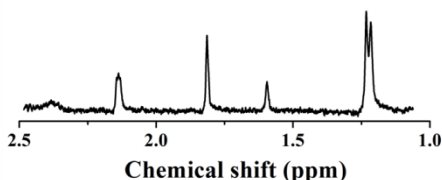

**Figure S11.** Partial HNMR spectra for the reaction between in-situ regenerated NADH and pyruvate in the presence of L-lactate dehydrogenase: (a) before the reaction; (b) after the enzymatic reaction.
